# Supplementary material
Source: publisher figshare collection journal article supplement (https://tandf.figshare.com/ndownloader/files/20121689)
Supplement: Supplementary file 1 [file 20121689]

Supplementary table 1 - Fungi and yeasts isolated from air, surfaces and discoloured paper documents/artworks, in libraries, archives or museums with paper-based collections.

| **Fungal species** | **Air samples** | **Surfaces**  (*e.g.* shelves, reading tables, bindings) | **Discoloured paper** |
| --- | --- | --- | --- |
| ***Absidia* sp.** Tiegh**.** | India [1] | - | - |
| ***Acremoniella* sp.** Sacc | Argentina, [2] | - | - |
| ***Acremonium* sp.** Link | Argentina, Colombia, France, Lithuania, Mexico, Portugal [2–9] | Italy, France, Portugal [4,5,8,10] | Brazil, Czech Republic, Iran, Finland, Poland, Portugal [11–15] |
| ***Acremonium alabamense*** Morgan-Jones | Cuba [16] | - | - |
| ***Acremonium charticola***(Lindau) W. Gams | Poland [17,18] | - | - |
| ***Acremonium furcatum*** Moreau & V. Moreau ex W. Gams | Poland [19] | - | - |
| ***Acremonium fusidioides*** (Nicot) W. Gams | - | Italy [20] | - |
| ***Acremonium murorum*** (Corda) W. Gams | *See current name: Gliomastix murorum* | | |
| ***Acremonium roseum*** Petch | *See current name:* *Hyalocylindrophora rosea* | | |
| ***Acremonium strictum*** W. Gams | Lithuania, Poland [3,17,18,21] | - | - |
| ***Acrostalagmus albus*** Preuss | Lithuania [3] | - | - |
| ***Agaricomycetes* sp.** Doweld | - | - | Czech Republic, Poland [15] |
| ***Agaricus* sp.** L. | - | - | Czech Republic, Poland [15] |
| ***Agrocybe* sp.** Fayod | - | - | Czech Republic, Poland [15] |
| ***Alternaria* sp.** Nees | Argentina, Brazil, Colombia, Cuba, Ethiopia, France, India, Italy, Mexico, Poland, Portugal, Spain [2,4,23–32,5–9,17,19,22] | Italy, France, Portugal [4,5,8,10,28] | Argentina, Czech Republic, Cuba, Greece, Iran, Italy, Poland, Portugal [4,12,13,15,33–35] |
| ***Alternaria alternata*** (Fr.) Keissler | Argentina, Cuba, Egypt, India, Italy, Lithuania, Poland [3,16–20,27,33,36] | Italy, Poland, Portugal [4,5,10,19,20] | Greece, India, Portugal [35,37,38] |
| ***Alternaria arborescens*** E.G. Simmons | - | Portugal [4,5] | - |
| ***Alternaria dianthicola*** Neergaard | - | Portugal [4,5] | - |
| ***Alternaria infectoria*** E.G. Simmons | Italy [20,39] | - | Greece [35] |
| ***Alternaria tenuíssima*** (Nees) Wiltshire | Lithuania, Poland [3,19] | Poland [19] | - |
| ***Amanita* sp.** Pers***.*** | - | - | Czech Republic, Poland [15] |
| ***Ambarignomonia petiolorum*** (Schwein.) Sogonov | Italy [20] | - | - |
| ***Amesia cymbiformis*** (Lodha) X. Wei Wang & Samson | - | - | USA [40] |
| ***Amesia nigricolor***  (L.M. Ames) X. Wei Wang & Samson | Portugal [6] | - | Portugal [41] |
| ***Amyloporia* sp.** Bondartsev & Singer ex Singer | - | - | Czech Republic, Poland [15] |
| ***Anthostomelloides proteae***(S.J. Lee & Crous) Daranag. & K.D. Hyde | - | - | Indonesia [42] |
| ***Antrodia* sp.** P. Karst. | - | - | Czech Republic, Poland [15] |
| ***Antrodia sinuosa*** (Fr.) P. Karst. | Italy [20] | - | - |
| ***Armillaria* sp.** (Fr.) Staude | - | - | Czech Republic, Poland [15] |
| ***Arrhenia* sp.** Fr. | - | - | Czech Republic, Poland [15] |
| ***Arthrinium* sp.** Kunze | Portugal [4,5] | Portugal [4,5] | Portugal [4] |
| ***Arthrinium arundinis*** (Corda) Dyko & B. Sutton | - | - | [43] |
| ***Arthrinium phaeospermum*** (Corda) M.B. Ellis | Lithuania, Spain [3,22] | Italy [10] | - |
| ***Arthrinium urticae*** M.B. Ellis | - | - | Italy (Corte et al., 2003) |
| ***Arthrographis* sp.** G. Cochet ex Sigler & J.W. Carmich. | - | Portugal [4,5] | - |
| ***Ascochyta medicaginicola*** Q. Chen & L. Cai | - | - | Poland (Sterflinger and Engel, 2014) |
| ***Ascocoryne* sp.** J.W. Groves & D.E. Wilson | - | - | Czech Republic, Poland [15] |
| ***Aspergillus* sp.** P. Micheli ex Haller | Argentina, Colombia, Cuba, Ethiopia, India, Italy, Mexico, Spain, Lithuania, Poland, Portugal [2,3,24,26–29,31–33,4,5,7,9,17,20,22,23] | Italy, Poland, Portugal [4,5,10,20,21] | Argentina, Czech Republic, Cuba, Finland, Iran, Italy, Poland  [11,13,15,33,44–46] |
| ***Aspergillus aculeatinus*** Noonim, Frisvad, Varga & Samson | Nigeria [47] | - | - |
| ***Aspergillus aculeatus*** Iizuka | - | - | Indonesia [42] |
| ***Aspergillus alliaceus*** Thom & Church | Cuba [16,30] | Cuba [30] | - |
| ***Aspergillus auricomus*** (Guég.) Saito | Cuba [30] | Cuba [30] | - |
| ***Aspergillus awamori*** Nakazawa | India [1] | - | Indonesia, Poland [48,49] |
| ***Aspergillus calidoustus*** Varga | - | Portugal (Pinheiro, 2014,2015) | - |
| ***Aspergillus candidus*** Link | Cuba, Poland [16,17,30] | Cuba, Portugal [4,5,30] | India, Italy, Nigeria, Portugal  [4,37,50,51] |
| ***Aspergillus carneus*** (v. Tiegh.) Blochwitz | - | Italy [20] | Israel [52] |
| ***Aspergillus chevalieri*** L. Mangin | France, Lithuania [3,8] | - | - |
| ***Aspergillus clavatus*** Desm**.** | Argentina, Cuba , Lithuania, Poland [3,17,19,33] | - | Indonesia [49] |
| ***Aspergillus creber*** Jurjević, S. W. Peterson & B. W. Horn | Italy, Nigeria [20,39,47] | Italy [20,39] | Czech Republic, Poland [15] |
| ***Aspergillus flavipes*** (Bainier & Sartory) Thom & Church | Cuba, Lithuania [3,16] | - | - |
| ***Aspergillus flavus*** Link | Argentina, Colombia, Cuba, Egypt, India, Italy, Lithuania, Nigeria, Poland [1,3,47,53,16,17,20,27,30,33,36,39] | Cuba, Italy, Poland, Portugal [4,5,10,19,20,30] | Argentina, Brazil, Colombia, Cuba, Indonesia, Israel, Nigeria [33,47,49–54] |
| ***Aspergillus flavus var. oryzae*** (Ahlb.) Kurtzman | Cuba, Lithuania [3,30] | Cuba, Portugal [4,5,30] | France, Morocco [55,56] |
| ***Aspergillus foetidus*** Thom et Raper | Lithuania [3] | - | - |
| ***Aspergillus fumigatus*** Fresen. | Colombia, India, Italy, Egypt, Lithuania, Poland, Portugal, Spain [3,4,36,53,5,6,17–20,22,27] | France, Italy, Poland, Portugal  [4,5,8,10,18] | Colombia, India, Indonesia, Israel, Nigeria, Portugal, Slovakia, USA  [12,37,38,49,50,52,53,57,58] |
| ***Aspergillus glaucus*** (L.) Link | Poland [17] | Portugal [4,5] | Portugal [4] |
| ***Aspergillus* *insuetus***(Bainier) Thom & Church | Italy [20,39] | - | Indonesia [42] |
| ***Aspergillus japonicus*** Saito | Cuba [30] | Cuba, Italy [10,30] | Brazil, France [14,56] |
| ***Aspergillus jensenii*** Jurjevic*,* S.W. Peterson & B.W. Horn | - | Italy [20,39] | Indonesia [49] |
| ***Aspergillus melleus*** Yukawa | Poland [17] | - | Italy, Morocco [55,59] |
| ***Aspergillus nidulans***(Eidam) G. Winter | Egypt, Poland [17,36] | Italy, Portugal [4,5,10] | Italy, Portugal  [12,38,60] |
| ***Aspergillus niger*** Tiegh. | Argentina, Colombia, Cuba, Egypt, France, India, Italy, Lithuania, Nigeria, Poland, Portugal, Spain [1,3,21,22,24,27,30,33,36,39,47,53,4,5,8,16–20] | Cuba, Italy, France, Poland, Portugal [4,5,8,10,19,21,30] | Argentina, Brazil, Costa Rica, Cuba, Czech Republic, India, Indonesia, Israel, Italy, Nigeria, Morocco, Poland, Portugal, Spain [12,14,54,55,60–62,15,33,37,43,47,49,50,52] |
| ***Aspergillus ochraceus*** Wilhelm | Colombia, Egypt, France, Poland, Portugal [4–6,8,17,36,53] | France, Italy, Poland, Portugal [4,5,8,10,19] | Czech Republic, Poland, Portugal [12,15,48] |
| ***Aspergillus oryzae*** (Ahlb.) Cohn | *See current name:* *Aspergillus flavus var. oryzae* | | |
| ***Aspergillus ostianus*** Wehmer | Cuba, Poland [17,30] | Cuba [30] | - |
| ***Aspergillus penicillioides*** Speg. | Italy, Poland [17,39] | Italy, Portugal [4,5,39] | Italy, Japan, Portugal [4,63,64] |
| ***Aspergillus proliferans*** G. Sm. | Italy [39] | - | - |
| ***Aspergillus protuberus*** Munt.-Cvetk. | Italy [20,39] | Italy [20,39] | - |
| ***Aspergillus pulvericola***Visagie, Seifert, Frisvad & Samson | - | - | Indonesia [49] |
| ***Aspergillus puniceus*** Kwon-Chung et Fennell | Lithuania [3] | - | Portugal [12] |
| ***Aspergillus repens***(Corda) Sacc. | *See current name: Aspergillus reptans* | | |
| ***Aspergillus reptans*** Samson & W. Gams | Lithuania, Poland [3,17] | - | - |
| ***Aspergillus restrictus*** G. Sm. | Poland [18] | Portugal [4,5] | - |
| ***Aspergillus sclerotiorum***G.A. Huber | Italy [20,39] | - | Italy (Zotti et al., 2011) |
| ***Aspergillus sydowii*** (Bainier & Sartory) Thom & Church | Italy, Lithuania [3,20,39] | Italy, France, Poland, Portugal [4,5,8,10,18,20] | Portugal [12] |
| ***Aspergillus tamarii*** Kita | Colombia, India [1,53] | - | Israel, Nigeria [47,52] |
| ***Aspergillus terreus*** Thom | Argentina, Cuba, Lithuania, Portugal [3–5,33] | Portugal [4,5] | Israel, Italy, Poland, Portugal [4,48,52,64–66] |
| ***Aspergillus tubingensis*** Mosseray | - | Italy [20] | - |
| ***Aspergillus ustus*** (Bainier) Thom & Church | Lithuania, Poland [3,18] | Poland [18] | France, India, Portugal [12,37,56] |
| ***Aspergillus versicolor***(Vuill.) Tiraboschi | Argentina, Colombia, Cuba, France, Italy, Lithuania, Poland, Portugal [3,4,53,5,6,8,17,18,20,21,33] | Italy, France, Portugal [4,5,8,10,20,39] | Brazil, Costa Rica, Czech Republic, Finland, Indonesia, Italy, Japan, Nigeria, Poland, Portugal [4,11,54,60,64,67,12,14,15,38,43,47–49] |
| ***Aspergillus vitricola*** Ohtsuki | Italy [20] | Italy [20] | - |
| ***Aspergillus wentii*** Wehmer | Lithuania [3] | - | - |
| ***Aureobasidium* sp.** Viala & G. Boyer | Brazil, Italy, Mexico, Portugal [4,5,7,23,25] | Portugal [4,5] | Czech Republic, Finland, Poland [11,15] |
| ***Aureobasidium pullulans***(de Bary) G. Arnaud | France, Italy, Lithuania, Poland [3,8,18,20] | France [8] | Italy, Portugal  [4,45,51,64] |
| ***Auricularia* sp.** Bull. ex Juss. | - | - | Czech Republic, Poland [15] |
| ***Basipetospora* sp.** G.T. Cole & W.B. Kendr. | Argentina [2] | - | - |
| ***Beauveria* sp.** Vuill. | Poland, Portugal [4,5,19] | Portugal [4,5] | Czech Republic, Poland [15] |
| ***Bipolaris* sp.**  Shoemaker | - | - | Czech Republic, Poland [15] |
| [***Bipolaris australiensis*** (M.B. Ellis) Tsuda & Ueyama](http://www.mycobank.org/BioloMICS.aspx?TableKey=14682616000000067&Rec=46415&Fields=All) | Cuba [30] | - | - |
| ***Bispora*****sp.**Corda | India [32,68] | - | - |
| ***Bjerkandera adusta*** (Willd.) P. Karst. | Italy [20] | - | France [56] |
| ***Blastodendrion arztii*** M. Ota | Cuba [16] | Portugal [4,5] | - |
| ***Blastomyces* sp**. Constantin & Rolland | *See current name: Chrysosporium Corda* | | |
| ***Blumeria* sp.** Golovin ex Speer | - | - | Czech Republic, Poland [15] |
| ***Botrytis* sp.**P. Micheli ex Haller | Argentina, Colombia, Italy, Poland, Portugal [2,4,5,9,19,23] | Portugal [4,5] | Portugal [12] |
| ***Botrytis cinerea*** Pers. | Italy, Lithuania, Poland, Spain, [3,18–20,22,24,39] | France, Italy [8,10] | Italy, Portugal [38,60] |
| ***Botryotrichum*****sp.** Sacc. & Marchal | Cuba [29] | - | - |
| ***Botryotrichum murorum*** (Corda) X. Wei Wang & Samson | - | - | Czech Republic, Poland, Portugal [15,41,62] |
| ***Botryotrichum piluliferum***Sacc. & Marchal | - | - | Poland [48] |
| ***Bovista* sp.** Pers***.*** | - | - | Czech Republic, Poland [15] |
| ***Bulleromyces albus*** Boekhout & Á. Fonseca | Italy [20] | - | - |
| ***Byssochlamys* sp.** Westling | - | - | Czech Republic, Poland [15] |
| ***Calcarisporium* sp.** Preuss | Colombia [9] | - | - |
| ***Calocybe* sp.** | - | - | Czech Republic, Poland [15] |
| ***Candida* sp.**Berkhout | Cuba, India, Lituania, Poland [3,17,29,32] | - | Greece [35] |
| ***Candida acidothermophilum*** Masuda, Kato, Takayama, Kida & Nakan. | - | Portugal [4,5] | - |
| ***Candida albicans***(C.P. Robin) Berkhout | Lithuania [3] | - | - |
| ***Candida famata*** (F.C. Harrison) S.A. Mey. & Yarrow | *See current name: Debaryozyma hansenii (Zopf)* | | |
| ***Candida glabrata*** (H.W. Anderson) S.A. Mey. & Yarrow | - | Portugal [4,5] | - |
| ***Candida guilliermondii*** (Castell.) Langeron & Guerra | *See current name: Blastodendrion arztii* | | |
| ***Candida krusei*** (Castell.) Berkhout | *See current name:* *Candida acidothermophilum* | | |
| ***Candida oleophila*** Montrocher | - | Portugal [4,5] | Portugal [4] |
| ***Candida parapsilosis***(Ashford) Langeron & Talice | - | Portugal [4,5] | - |
| ***Candida sphaerica*** (B.W. Hammer & Cordes) S.A. Mey. & Yarrow | - | Poland [19] | - |
| ***Catathelasma* sp.** Lovejoy | - | - | Czech Republic, Poland [15] |
| ***Cephalosporium* sp*.*** Corda | Colombia, Cuba [9,16,30] | - | - |
| ***Cephalotrichum* sp*.*** Link | - | - | Portugal [12] |
| ***Cephalotrichum stemonitis*** (Pers.) Nees | Lithuania [3] | - | Italy [45,51] |
| ***Ceratosporium* sp.**Schwein**.** | Argentina [2] | - | - |
| ***Chaetomium* sp.** Kunze | Argentina, Colombia, India, Italy, Lithuania, Mexico, Poland, Spain [2,3,7,9,18,21,23,24,27,32] | Italy, Portugal [4,5,10] | Czech Republic, Finland, Poland, Portugal, USA [11,12,15,41,57] |
| ***Chaetomium barilochense*** Calviello | - | - | USA [40] |
| ***Chaetomium brasiliense*** Bat. & Pontual | *See current name: Ovatospora brasiliensis* | | |
| ***Chaetomium bostrychodes*** Zopf | Poland [17] | - | Portugal [4] |
| ***Chaetomium* *cymbiforme*** Lodha | *See current name: Amesia cymbiformis* | | |
| ***Chaetomium elatum*** Kunze | - | - | Czech Republic, Italy, Poland [15,62,65,66] |
| ***Chaetomium elongatum*** Czerepanova | Poland [17,21] | - | - |
| ***Chaetomium* g*racile*** Udagawa | *See current name: Chaetomium virescens var. thielavioideum* | | |
| ***Chaetomium funicola*** Cooke | *See current name: Dichotomopilus funicola* | | |
| ***Chaetomium globosum*** Kunze ex Fr. | Lithuania, Poland, Portugal [3,6,18] | Italy, Poland [10,19] | Costa Rica, Czech Republic, Italy, India, France, Poland, Portugal, USA [12,15,37,38,40,41,43,44,56,62] |
| ***Chaetomium indicum*** Corda | Spain [22] | - | Portugal [12] |
| ***Chaetomium murorum*** Corda | *See current name: Botryotrichum murorum* | | |
| ***Chaetomium nigricolor*** L.M. Ames | *See current name: Amesia nigricolor* | | |
| ***Chaetomium subaffine*** Sergeeva | - | Italy [20] | - |
| ***Chaetomium subglobosum*** Sergeeva | *See current name: Chaetomium globosum* | | |
| ***Chaetomium virescens var. thielavioideum*** (K.T. Chen) P.F. Cannon | - | - | Italy [44] |
| ***Chaetosartorya stromatoides***B.J. Wiley & E.G. Simmons | - | - | Indonesia [42] |
| ***Chaetothyriales* sp.**M.E. Barr | - | - | Czech Republic, Poland [15] |
| ***Chalastospora gossypii*** (Jacz.) U. Braun & Crous | Portugal [4,5] | Portugal [4,5] | Greece [35] |
| ***Chromelosporium carneum*** (Pers.) Hennebert | - | - | Portugal [38] |
| ***Chrysonilia* sp.** Arx | Portugal, Spain [4,5,24] | Portugal [4,5] | Portugal [4] |
| ***Chrysonilia sitophila*** (Mont.) Arx | Cuba, Poland, [16,17,19] | Portugal [4,5] | - |
| ***Chrysosporium* sp.** Corda | Argentina, Cuba, Lithuania, Mexico, Portugal [2–5,7,29] | Portugal [4,5] | Portugal [12] |
| ***Chrysosporium carmichaelli*** Oorschot | - | - | Portugal [4] |
| ***Chrysosporium merdarium***(Link) J.W. Carmich. | Lithuania [3] | - | - |
| ***Cladophialophora* sp.**Borelli | - | Portugal [4,5] | - |
| ***Cladosporium* sp.** Link | Argentina, Brazil, Colombia, Cuba, Ethiopia, India, Italy, Mexico, Poland, Portugal, Spain [2,4,26,29,31–33,5,7,9,17,22–25] | Italy, Portugal [4,5,10] | Argentina, Brazil, Czech Republic, Costa Rica, Cuba, Finland, Greece, Iran, Italy, Nigeria, Poland, Portugal, USA [4,11,54,57,60,64,69,12,13,15,33,35,43,46,50] |
| ***Cladosporium angustisporum*** Bensch, Summerell, Crous & U. Braun | - | - | Costa Rica [43] |
| ***Cladosporium cladosporioides*** (Fresen.) G.A. de Vries | Argentina, Cuba, Egypt, France, Italy, Lithuania, Poland [3,8,16–20,33,36,39] | Cuba, Italy, Poland [10,18,19,30] | Brazil, Costa Rica, Italy, Portugal [14,38,43,51,60] |
| ***Cladosporium colocasiae***Sawada | - | - | Indonesia [42] |
| ***Cladosporium colombiae***K. Schub. & Crous | - | - | Indonesia [42] |
| ***Cladosporium coraloides*** Yamamoto | Italy [20] | - | - |
| ***Cladosporium elatum*** (Harz) Nannf. | *See current name: Ochrocladosporium elatum* | | |
| ***Cladosporium fulvum*** Cooke | *See current name: Fulvia fulva* | | |
| ***Cladosporium halotolerans*** Zalar, de Hoog & Gunde-Cim. | Italy [20] | Italy [20] | - |
| ***Cladosporium herbarum***(Pers.) Link | Argentina, Cuba, France, India, Lithuania, Poland, Spain [1,3,8,18,19,24,33,68] | Cuba, France, Italy, Poland  [8,10,18,19,30] | India, Italy, Poland [37,60,70] |
| ***Cladosporium macrocarpum*** Preuss | - | Italy [10] | - |
| ***Cladosporium ossifragi*** (Rostr.) U. Braun & K. Schub. | Italy [39] | - | - |
| ***Cladosporium oxysporum*** Berk. & M.A. Curtis | - | Cuba [30] | USA [57] |
| ***Cladosporium perangustum*** Bensch, Crous & U. Braun | Italy [20] | - | - |
| ***Cladosporium pini-ponderosae*** K. Schub., Gresl. & Crous | - | - | Indonesia [42] |
| ***Cladosporium pseudocladosporioides*** Bensch,Crous & U. Braun | Italy [20,39] | - | - |
| ***Cladosporium ramotenellum*** K. Schub., Zalar, Crous & U. Braun | Italy [20,39] | Italy [20,39] | - |
| ***Cladosporium sphaerospermum*** Penz. | Argentina, Cuba, France, Italy, Lithuania [3,8,20,33,39] | Cuba, France [8,30] | Costa Rica, Italy, USA [43,44,57,59] |
| ***Cladosporium tenuissimum*** Cooke | - | - | Costa Rica [43] |
| ***Claviceps* sp.** Tul***.*** | - | - | Czech Republic, Poland [15] |
| ***Clavulinaceae* sp.** Donk | - | - | Czech Republic, Poland [15] |
| ***Clitopilus* sp.** (Fr. ex Rabenh.) | - | - | Czech Republic, Poland [15] |
| ***Clonostachys* sp.** Corda | India [32] | *-* | *-* |
| ***Clonostachys rosea f. catenulata*** (J.C. Gilman & E.V. Abbott) Schroers | - | - | Poland [48] |
| ***Colletotrichum* sp.** Corda | - | - | Czech Republic, Poland [15] |
| ***Colletotrichum kahawae*** J.M. Waller & Bridge | - | - | Costa Rica [43] |
| ***Conidiocarpus* sp*.*** Woron | - | - | Czech Republic, Poland [15] |
| ***Coniochaeta* sp.** (Sacc.) Cooke | - | - | Czech Republic, Costa Rica, Poland [15,43] |
| ***Coniophora* sp.** DC**.** | - | - | Czech Republic, Poland [15] |
| ***Coprinellus* sp.** P. Karst. | - | - | Czech Republic, Poland [15] |
| ***Coprinus* sp.** Pers. | - | - | Portugal [38] |
| ***Cordyceps* sp.**Fr***.*** | - | - | Czech Republic, Poland [15] |
| ***Cordyceps farinosa*** (Holmsk.) Kepler, B. Shrestha & Spatafora | Italy [20] | - | - |
| ***Cordyceps sinensis*** (Berk.) Sacc. | *See current name: Ophiocordyceps sinensis* | | |
| ***Coriolopsis trogii*** (Berk.) Domanski | Italy [20] | - | - |
| ***Cortinarius* sp.** (Pers.) Gray | - | - | Czech Republic, Poland [15] |
| ***Corynascus sepedonium*** (C.W. Em-mons) Arx | - | Portugal [4,5] | - |
| ***Crepidotus* sp.** (Fr.) Staude | - | - | Czech Republic, Poland [15] |
| ***Crucibulum* sp.** Tul. & C. Tul. | - | - | Czech Republic, Poland [15] |
| ***Cryomyces* sp.**Selbmann, de Hoog, Mazzaglia, Friedmann & Onofri | - | - | Czech Republic, Poland [15] |
| ***Cryptococcus* sp.** Vuill | Poland [17] | Portugal [4,5] | Czech Republic, Poland [15] |
| ***Cryptococcus albidus*** (Saito) C.E. Skinner | Mexico [7] | Portugal [4,5] | - |
| ***Cryptococcus laurentii***(Kuff.) C.E. Skinner | *See current name: Cryptococcus laurenti var laurenti* | | |
| ***Cryptococcus laurentii******var laurentii*** | Mexico, Poland [7,17,19] | Portugal [4,5] | - |
| ***Cryptococcus neoformans var. uniguttulatus*** (Zach) Lodder & Kreger | - | Poland [19] | - |
| ***Cunninghamella* sp.** Matr. | India, Mexico [7,32] | - | - |
| ***Cunninghamella elegans*** Lendn. | - | - | Italy [44] |
| ***Curvularia* sp.**Boedijn | Argentina, Brazil, Cuba, India, Mexico [1,2,7,25,27,31–33] | Portugal [4,5] | Czech Republic, Poland [15] |
| ***Curvularia eragrostidis*** (Henn.) J.A. Mey. | Cuba [16,30] | - | - |
| ***Curvularia lunata*** (Wakker) Boedijn | Egypt, Lituania, Spain [3,24,36] | - | - |
| ***Curvularia pallescens***Boedijn | Cuba, Egypt [16,30,36] | - | - |
| ***Curvularia uncinata*** Bugnic**.** | - | - | India [37] |
| ***Curvularia verruculosa*** Tandon & Bilgrami ex M.B. Ellis | Nigeria [47] | - | - |
| ***Cyathus* sp.** Haller | - | - | Czech Republic, Poland [15] |
| ***Cylindrobasidium* sp.** Jülich | - | - | Czech Republic, Poland [15] |
| ***Cystoderma* sp*.*** Fayod | - | - | Czech Republic, Poland [15] |
| ***Cystolepiota* sp*.*** Singer | - | - | Czech Republic, Poland [15] |
| ***Dactylella* sp.**Grove | Argentina [2] | - | - |
| ***Daldinia* sp.**Ces. & De Not. | - | - | Czech Republic, Poland [15] |
| ***Davidiella tassiana***(De Not.) Crous & U. Braun | *See current name: Cladosporium herbarum* | | |
| ***Debaromyces hansenii*** (Zopf) Lodder & Kreger | - | Portugal [4,5] | Italy [60] |
| ***Debaryozyma hansenii*** (Zopf) Van der Walt & Johannsen | Poland [17,21] | Poland [21] | - |
| ***Diaporthe* sp.** Nitschke | - | - | Czech Republic, Poland [15] |
| ***Dichotomopilus funicola*** (Cooke) X. Wei Wang & Samson | - | Italy [20] | - |
| ***Didymella glomerata*** (Corda) Q. Chen & L. Cai | Italy [20,39] | Portugal [4,5] | - |
| ***Didymella negriana*** (Thümen) Q. Chen & L. Cai | Italy [20] | - | - |
| ***Didymella pomorum*** (Thümen) Q. Chen & L. Cai | - | - | Italy [44] |
| ***Diplodia* sp.** Fr. | - | - | Czech Republic, Poland [15] |
| ***Dipodascopsis* sp.** L.R. Batra & Millner | - | - | Czech Republic, Poland [15] |
| ***Doratomyces stemonitis*** (Pers.) F.J. Morton & G. Sm | *See current name: Cephalotrichum stemonitis* | | |
| ***Dothideales* sp.** Lindau | - | - | Czech Republic, Poland [15] |
| ***Drechslera* sp.**S. Ito | Argentina, Egypt, India, Mexico [2,7,27,32,36] | - | - |
| ***Embellisia abundans*** E.G. Simmons | Italy [20,39] | - | - |
| ***Emericella nidulans*** (Eidam) Vuill | *See current name: Aspergillus nidulans* | | |
| ***Epichloe* sp.** (Fr.) Tul. & C. Tul. | - | - | Czech Republic, Poland [15] |
| ***Epicoccum* sp.**Link | Argentina, Brazil, Cuba, Egypt, Italy, Mexico [2,7,23,25,30,31,36] | - | - |
| ***Epicoccum nigrum*** Link | Italy, Poland [18–20][18](Zielińska-Jankiewicz et al. 2008)[18]<sup>18</sup>(18)(18)(18)(18) | Italy, Portugal [4,5,39] | Brazil, Greece, Italy, Portugal [4,35,44,54,60] |
| ***Epicoccum purpurascens*** Ehrenb | *See current name: Epicocum nigrum* | | |
| ***Eremascus* sp.** Eidam | - | - | Czech Republic, Poland [15] |
| ***Erysiphe* sp*.*** R. Hedw. ex DC. | - | - | Czech Republic, Poland [15] |
| ***Eurotium* sp.**Link | France, Portugal [4,5,8] | France, Portugal [4,5,8] | Canada, Finland [11,71] |
| ***Eurotium amstelodami*** L. Mangin | Poland [17] | Italy, Poland, Portugal [4,5,19,20] | Brazil [54] |
| ***Eurotium chevalieri*** L. Mangin | Italy [20,39] | Italy, Portugal [4,5,20,39] | - |
| ***Eurotium halophilicum*** C.M. Chr., Papav. & C.R. Benj. | - | Italy [20,39] | Italy, Portugal [4,46,64] |
| ***Eurotium herbariorum*** (Weber ex F.H. Wigg.) Link | - | Portugal [4,5] | Japan [63] |
| ***Eurotium pseudoglaucum*** (Blochwitz) Malloch & Cain | - | - | [Italy](file:///C:\Sílvia\AppData\Roaming\Microsoft\Word\tabela%20fungos%20artigo.xlsx#RANGE!_ENREF_5) [44] |
| ***Eurotium repens*** de Bary | *See current name: Eurotium rubrum* | | |
| ***Eurotium rubrum*** Jos. König et al. | Poland [18] | Portugal [4,5] | Indonesia, Portugal [41,49] |
| ***Eutypa* sp.** Tul. & C. Tul. | - | - | Czech Republic, Poland [15] |
| ***Exophiala* sp.** J.W. Carmich | - | Portugal [4,5] | Czech Republic, Finland, Poland, Portugal [4,11,15] |
| ***Exophiala castellanii*** Iwatsu, Nishim. & Miyaji, | Cuba [16] | - | - |
| ***Exophiala werneckii*** (Horta) Arx | *See current name: Hortaea werneckii* | | |
| ***Fayodia* sp.** Kühner | - | - | Czech Republic, Poland [15] |
| ***Fibroporia* sp.** Parmasto | - | - | Czech Republic, Poland [15] |
| ***Filobasidiella* sp.** Kwon-Chung | *See current name: Cryptococcus sp.* | | |
| ***Fistulina* sp.** Bull. | - | - | Czech Republic, Poland [15] |
| ***Flammulaster* sp.** Earle | - | - | Czech Republic, Poland [15] |
| ***Flammulina* sp.** P. Karst. | - | - | Czech Republic, Poland [15] |
| ***Flavomyces fulophazii***D.G. Knapp, Kovács, J.Z. Groenew. & Crous | - | - | Indonesia [42] |
| ***Fomes* sp.** (Fr.) Fr. | - | - | Czech Republic, Poland [15] |
| ***Fulvia fulva*** (Cooke) Cif. | Spain [24] | Cuba [30] | - |
| ***Fumiglobus* sp.**D.R. Reynolds & G.S. Gilbert | - | - | Czech Republic, Poland [15] |
| ***Funalia trogii*** (Berk.) Bondartsev & Singer | *See current name: Coriolopsis trogii* | | |
| ***Fusarium* sp.**Link | Argentina, Brazil, Cuba, India, Italy, Mexico, Poland, Portugal, Spain [2,4,27,29,31–33,5–7,17,18,23–25] | Portugal [4,5] | Brazil, Finland, Portugal [4,11,14] |
| ***Fusarium equiseti*** (Corda) Sacc. | Colombia [53] | - | Colombia, Indonesia [42,53] |
| ***Fusarium fujikuroi***Nirenberg | - | - | Indonesia [42] |
| ***Fusarium incarnatum*** (Roberge) Sacc. | Spain [24] | - | - |
| ***Fusarium oxysporum*** Schltdl. | Cuba, Egypt, Italy [16,20,36,39] | - | India, Portugal, USA  [4,37,57] |
| ***Fusarium proliferatum*** (Matsush.) Nirenberg | Cuba, Portugal [6,16] | - | - |
| ***Fusarium semitectum*** Berk. & Ravenel | *See current name:*  *Fusarium incarnatum* | | |
| ***Fusarium solani***(Mart.) Sacc*.* | Argentina, Cuba, Portugal [6,33] | - | - |
| ***Fusicladium* sp.** Bonord. | - | - | Italy [44] |
| ***Ganoderma* sp.** P. Karst. | - | - | Czech Republic, Poland [15] |
| ***Geomyces* sp.** Traaen | - | Portugal [4,5] | Japan [67] |
| ***Geomyces pannorum***(Link) Sigler & J.W. Carmich | *See current name: Pseudogymnoascus pannorum* | | |
| ***Geosmithia putterillii*** (Thom) Pitt | - | - | Italy [45,51] |
| ***Geotrichum* sp.**Link | Argentina, Brazil, Cuba, India, Italy, Portugal [4,5,23,25,27,33] | Portugal [4,5] | - |
| ***Geotrichum candidum*** Link | Argentina, Lithuania, Poland, Spain [2,3,17,21,24] | - | - |
| ***Gilmaniella* sp.** G.L. Barron | Cuba [29] | - | - |
| ***Gliocladium* sp.**Corda | Colombia, Poland, Spain [9,19,24] | Portugal [4,5] | - |
| ***Gliocladium catenulatum*** J.C. Gilman & E.V. Abbott | *See current name: Clonostachys rosea f. catenulata* | | |
| ***Gliocladium roseum*** Bainier | Lithuania [3] | - | Israel [52] |
| ***Gliocladium virens***J. H. Mill. Giddens & A.A. Foster | *See current name: Trichoderma virens* | | |
| ***Gliomastix murorum*** (Corda) S. Hughes | Lithuania, Poland [3,18] | Poland [18] | - |
| ***Gloeophyllum abietinum***(Bull.) P. Karst. | - | Italy [20,39] | - |
| ***Gloeophyllum* sp.** P. Karst. | - | - | Czech Republic, Poland [15] |
| ***Gloeophyllum sepiarium*** (Wulfen) P. Karst. | Italy [20] | - | - |
| ***Gloeophyllum subferrugineum*** (Berk.) Bondartsev & Singer | Italy [20] | - | - |
| ***Gloeotinia granigena*** (Quél.) T. Schumach. | - | - | France [56] |
| ***Gloeotinia temulenta*** (Prill. & Delacr.) M. Wilson, Noble & E.G. Gray | *See current name: Gloeotinia granigena* | | |
| ***Gnomonia petiolorum*** (Schwein.) Cooke | *See current name:* *Ambarignomonia petiolorum* | | |
| ***Gonytrichum* sp.**Nees & T. Nees | Argentina [2] | - | - |
| ***Graphiopsis* sp.** Trail | - | - | Czech Republic, Poland [15] |
| ***Graphium* sp.**Corda | Portugal [4,5] | Portugal [4,5] | - |
| ***Gymnascella* sp.** Peck | - | Portugal [4,5] | - |
| ***Gymnopus* sp.** (Pers.) Roussel | - | - | Czech Republic, Poland [15] |
| ***Hansfordia* sp.** S. Hughes | - | - | Nigeria [47] |
| ***Haplosporangium* sp.** Thaxt. | Colombia [9] | - | - |
| ***Harpographium* sp.** Sacc. | Argentina [2] | - | - |
| ***Helminthosporium* sp.** Link | Argentina, Brazil, India [2,25,27,68] | - | Iran [13] |
| ***Hebeloma* sp.**  (Fr.) P. Kumm. | - | - | Czech Republic, Poland [15] |
| ***Helotiales* sp.**Nannf***.*** | - | - | Czech Republic, Poland [15] |
| ***Herpotrichiellaceae* sp.** Munk | - | - | Czech Republic, Poland [15] |
| ***Heterocephalum* sp.**Thaxt. | Poland [17] | - | - |
| ***Heterocephalum auranticum*** Thaxt. | Poland [17] | - | - |
| ***Hexagonia nitida*** Durieu & Mont. | Italy [20] | - | - |
| ***Hirsutella* sp.** Pat***.*** | - | - | Czech Republic, Poland [15] |
| ***Hohenbuehelia* sp.** Schulzer | - | - | Czech Republic, Poland [15] |
| ***Hormographiella* sp.** Guarro & Gené | - | Portugal [4,5] | - |
| ***Hormographiella aspergillata*** Guarro, Gené & De Vroey | Portugal [4,5] | Portugal [4,5] | - |
| ***Hortaea werneckii*** (Horta) Nishim. & Miyaji | - | Portugal [4,5] | - |
| ***Humicola* sp.**Traaen | Argentina, Italy [2,23] | - | Portugal [12] |
| ***Humicola fuscoatra*** Traaen | Poland [18] | - | - |
| ***Humicola grisea*** Traaen | *See current name: Trichocladium griseum* | | |
| ***Hyalocylindrophora rosea*** (Petch) Réblová & W. Gams | Lithuania [3] | - | - |
| ***Hygrophorus* sp.** Fr. | - | - | Czech Republic, Poland [15] |
| ***Hymenopellis* sp*.*** R.H. Petersen | - | - | Czech Republic, Poland [15] |
| ***Hyphodiscus* sp.**Kirschst***.*** | - | - | Czech Republic, Poland [15] |
| ***Hypholoma* sp.** (Fr.) P. Kumm. | - | - | Czech Republic, Poland [15] |
| ***Hypocrea lixii*** Pat. | - | - | Morocco [55] |
| ***Hypocrella* sp.** Sacc***.*** | - | - | Czech Republic, Poland [15] |
| ***Hypoxylon* sp.** Bull***.*** | Cuba [29] | - | - |
| ***Isaria* sp.** Pers***.*** | - | - | Czech Republic, Poland [15] |
| ***Itersonilia* sp.** Derx | Cuba [29] | - | - |
| ***Juncaceicola typharum*** (Desm.) Tennakoon, Phook. & K.D. Hyde | - | Italy [20,39] | - |
| ***Kockovaella* sp.** Nakase, I. Banno & Y. Yamada | - | - | USA [57] |
| ***Laccaria* sp.** Berk. & Broome | - | - | Czech Republic, Poland [15] |
| ***Lasiosphaeriaceae* sp.** Nannf**.** | - | - | Czech Republic, Poland [15] |
| ***Lecanicillium kalimantanense*** Kurihara & Sukarno | - | Italy [20,39] | - |
| ***Lecophagus* sp*.*** M.W. Dick | - | - | Czech Republic, Poland [15] |
| ***Lentaria* sp.** Corner | - | - | Czech Republic, Poland [15] |
| ***Lentinula* sp.** Earle | - | - | Czech Republic, Poland [15] |
| ***Leotiomycetes* sp*.*** O.E. Erikss. & Winka | - | - | Czech Republic, Poland [15] |
| ***Lepiota* sp.** (Pers.) Gray | - | - | Czech Republic, Poland [15] |
| ***Lepista* sp.** (Fr.) W.G. Sm. | - | - | Czech Republic, Poland [15] |
| ***Leptosphaeria* sp.**Ces. & De Not. | - | - | Czech Republic, Poland [15] |
| ***Leptosphaeria microscopica*** P. Karst. | *See current name: Phaeosphaeria microscopica* | | |
| ***Leucoagaricus* sp*.*** Locq. Ex Singer | - | - | Czech Republic, Poland [15] |
| ***Leucocortinarius* sp.** (J.E. Lange) Singer | - | - | Czech Republic, Poland [15] |
| ***Leucocybe* sp.** Vizzini, P. Alvarado, G. Moreno & Consiglio | - | - | Czech Republic, Poland [15] |
| ***Lignosus* sp.** Lloyd ex Torrend | - | - | Czech Republic, Poland [15] |
| ***Limacella* sp.** Earle | - | - | Czech Republic, Poland [15] |
| ***Macrotyphula* sp.** R.H. Petersen | - | - | Czech Republic, Poland [15] |
| ***Madurella mycetomatis*** (Laveran) Brumpt | - | - | USA [57] |
| ***Magnaporthe* sp*.*** R.A. Krause & R.K. Webster | - | - | Czech Republic, Poland [15] |
| ***Malassezia* sp.** Baill. | - | - | Czech Republic, Poland [15] |
| ***Melanoleuca* sp.** Pat***.*** | - | - | Czech Republic, Poland [15] |
| ***Memnoniella echinata*** (Rivolta) Galloway | - | - | India [37] |
| ***Meruliopsis corium*** (Pers.) Ginns | Italy [20] | - | - |
| ***Metarhizium* sp.** Sorokin | - | - | Czech Republic, Poland [15] |
| ***Microsporum canis*** E. Bodin ex Guég. | Lithuania [3] | - | - |
| ***Microsporum gypseum*** (E. Bodin) Guiart & Grigoraki | Lithuania [3] | - | - |
| ***Moesziomyces parantarcticus***(Sugita, M. Takashima, Mekha & Poonwan) Q.M. Wang, Begerow, F.Y. Bai & Boekhout | - | - | Indonesia [42] |
| ***Monacrosporium* sp.** Oudem. | Colombia [9] | - | - |
| ***Monascus* sp.**Tiegh. | Brazil [25] | - | - |
| ***Monascus ruber*** Tiegh***.*** | India [1] | - | - |
| ***Monilia* sp.** Pers. | India, Mexico [7,32] | - | - |
| ***Moniliophthora* sp.** H.C. Evans | - | - | Czech Republic, Poland [15] |
| ***Monosporium silvaticum*** Oudem. | Poland [17] | - | - |
| ***Monotospora* sp.** Corda | Colombia [9] | - | - |
| ***Mortierella exigua*** Linnem. | Lithuania [3] | - | - |
| ***Mortierella ereal*** (Harz) W. Gams | Lithuania [3] | - | - |
| ***Mortierella polycephala*** Coem. | Lithuania [3] | - | - |
| ***Mortierella pusilla*** Oudem. | Lithuania [3] | - | - |
| ***Mucor* sp.**Fresen | Colombia, Egypt, India, Lithuania, Mexico, Poland, Portugal, Spain [1,3,36,4,5,7,9,19,24,31,32] | Portugal [4,5] | Finland, Iran, Portugal [11–13] |
| ***Mucor circinelloides*** Tiegh. | - | Poland [19] | - |
| ***Mucor globosus*** Schreb. | Poland [19] | - | - |
| ***Mucor mucedo*** L. | Lithuania [3] | - | - |
| ***Mucor piriformis*** A. Fisch. | Lithuania [3] | - | - |
| ***Mucor plumbeus*** Bonord. | Poland [17] | - | Slovakia [58] |
| ***Mucor racemosus*** Fresen. | Cuba, Lithuania, Poland [3,16,17] | - | Morocco [55] |
| ***Mucor spinosus*** Tiegh. | *See current name: Mucor plumbeus* | | |
| ***Mucor strictus*** Hagem | Lithuania [3] | - | - |
| ***Multiclavula* sp.** R.H. Petersen | - | - | Czech Republic, Poland [15] |
| ***Mycena* sp.** (Pers.) Roussel | - | - | Czech Republic, Poland [15] |
| ***Mycenella* sp.** (J.E. Lange) Singer | - | - | Czech Republic, Poland [15] |
| ***Myrothecium roridum*** Tode | *See current name: Paramyrothecium roridum* | | |
| ***Myxotrichum deflexum*** Berk. | - | - | Czech Republic, Japan, Poland, Portugal [15,41,62,67] |
| ***Nectria* sp.** (Fr.) Fr. | - | Portugal [4,5] | - |
| ***Neocamarosporium betae*** (Berl.) Ariyaw. & K.D. Hyde | Spain [24] | - | - |
| ***Neolentinus* sp.** Redhead & Ginns | - | - | Czech Republic, Poland [15] |
| ***Neurospora* sp.** Shear & B.O. Dodge | Argentina, Brazil, Cuba [2,25,33] | - | Nigeria [50] |
| ***Neurospora crassa*** Shear & B.O. Dodge | Cuba [16] | - | - |
| ***Neurospora intermedia*** F.L. Tai | Nigeria [47] | - | - |
| ***Nigrospora* sp.**Zimm. | Argentina, Brazil, Cuba [2,25,29] | Portugal [4,5] | - |
| ***Nigrospora sphaerica*** (Sacc.) E.W. Mason | Cuba [16] | - | - |
| ***Nodulisporium* sp.** Preuss | *See current name: Hypoxylon sp.* | | |
| ***Ochrocladosporium elatum*** (Harz) Crous & U. Braun | Argentina, Cuba [33] | Cuba [30] | - |
| ***Oidiodendron* sp.**Robak | Poland [17] | - | Czech Republic, Finland, Poland [11,15] |
| ***Oidiodendron ereal*** (Thüm.) G.L. Barron | - | - | Czech Republic, Poland [15] |
| ***Oidiodendron citrinum*** G.L. Barron | Poland [17] | - | Italy [44] |
| ***Oidiodendron echinulatum*** G.L. Barron | Lithuania [3] | - | - |
| ***Oidiodendron flavum*** Szilvinyi | Poland [17] | - | - |
| ***Oidiodendron maius*** G.L. Barron | - | - | Italy [44] |
| ***Oidiodendron rhodogenum*** Robak | Poland [17] | - | - |
| ***Oidiodendron truncatum*** G.L. Barron | Poland [17] | - | - |
| ***Oidium* sp.** Link | India [32] | - | - |
| ***Omphalotus* sp.** Fayod | - | - | Czech Republic, Poland [15] |
| ***Onygena* sp.** Pers***.*** | - | - | Czech Republic, Poland [15] |
| ***Oospora* sp.** Wallr. | *See current name: Oidium sp.* | | |
| ***Ophiocordyceps* sp.** Petch | - | - | Czech Republic, Poland [15] |
| ***Ophiocordyceps sinensis*** (Berk.) G.H. Sung, J.M. Sung, Hywel-Jones & Spatafora | - | - | France [56] |
| ***Ovatospora brasiliensis*** (Bat. & Pontual) X. Wei Wang & Samson | - | - | USA [40] |
| ***Ovulariopsis* sp.** Pat. & Har. | Cuba [29] | - | - |
| ***Paecilomyces* sp.** Bainier | Argentina, Colombia, Cuba, Mexico, Poland, Portugal, Spain [2,4,5,7,9,17,24,29] | Portugal [4,5] | Finland, Portugal [4,11,12] |
| ***Paecilomyces farinosus*** (Holmsk.) A.H.S. Br. & G. Sm. | *See current name:* *Cordyceps farinosa* | | |
| ***Paecilomyces variotii*** Bainier | Cuba, Lithuania, Poland [3,16–18] | Italy, Poland [10,18,19] | Italy, Poland [48,51] |
| ***Pallidocercospora* sp.** Crous | - | - | Czech Republic, Poland [15] |
| ***Panaeolus* sp.** (Fr.) Quél. | - | - | Czech Republic, Poland [15] |
| ***Panellus* sp*.*** P. Karst. | - | - | Czech Republic, Poland [15] |
| ***Papularia* sp.** Fr. | Colombia [9] | - | - |
| ***Paraconiothyrium fuckelii*** (Sacc.) Verkley & Gruyter | Italy [20] | - | - |
| ***Paramyrothecium roridum*** (Tode) L. Lombard & Crous | Italy, Spain [23,24] | - | - |
| ***Parasola* sp.** Redhead | - | - | Czech Republic, Poland [15] |
| ***Parastagonospora* sp.** Quaedvlieg, Verkley & Crous | - | - | Czech Republic, Poland [15] |
| ***Passalora* sp.** Fr***.*** | - | - | Czech Republic, Poland [15] |
| ***Peltigera* sp.** Wild | - | - | Czech Republic, Poland [15] |
| ***Penicillium* sp.**Link | Argentina, Brazil, Colombia, Cuba, Ethiopia, France, India, Italy, Lithuania, Mexico, Poland, Portugal, Spain [2,3,21–29,31,4,32,33,5–9,17,18] | Cuba, France, Italy, Poland, Portugal [4,5,8,10,18,21,30] | Argentina, Brazil, Czech Republic, Cuba,  Finland, Greece, Iran, Italy, Japan, Nigeria, Poland, Portugal, USA [4,11,57,60,64,67,69,13–15,33,35,38,46,50] |
| ***Penicillium arenicola*** Chalab. | - | - | Brazil [14] |
| ***Penicillium aurantiogriseum*** Dierckx | Poland [17] | - | Poland [48] |
| ***Penicillium bilaiae*** Chalab. | - | - | Portugal [12] |
| ***Penicillium brasilianum*** Bat. | Nigeria [47] | - | - |
| ***Penicillium brevicompactum*** Dierckx | Italy, Poland [17,20,39] | Italy [10,20,39] | Italy, Portugal [12,44] |
| ***Penicillium canescens*** Sopp | Cuba [30] | Cuba [30] | Italy, Portugal [38,44] |
| ***Penicillium caseifulvum*** Lund, Filt. & Frisvad | Italy [20] | - | - |
| ***Penicillium catenatum*** D.B. Scott | - | Italy [20] | - |
| ***Penicillium chermesinum*** Biourge | Lithuania [3] | Italy [10] | - |
| ***Penicillium chrysogenum*** Thom | Argentina, Colombia, Cuba, Egypt, France, India, Italy, Lithuania, Nigeria, Poland [1,3,36,39,42,47,53,8,16–20,30,33] | Cuba, Italy, France, Poland [8,10,18,20,30,39] | Argentina, Brazil, Costa Rica, Cuba, Czech Republic, Greece, Italy, Japan, Morocco, Poland, Portugal, USA [15,33,60,62,64–67,70,35,38,41,43,44,54,55,57] |
| ***Penicillium citreonigrum*** Dierckx | France, Italy [8,20] | France, Italy [8,10] | Brazil, Japan, Portugal [12,14,67] |
| ***Penicillium citrinum*** Thom | Argentina, Cuba, India, Italy, Nigeria, Poland [1,16–18,20,30,33,47] | Cuba, France, Italy [8,10,30] | Argentina, Brazil, Cuba, France, Greece, Indonesia, Italy, Nigeria, Portugal [12,14,33,35,41,44,47,49,56] |
| ***Penicillium commune*** Thom | Argentina, Cuba, Poland, Spain [17,19,24,33] | - | Argentina, Cuba, Italy, Japan, Morocco, Portugal, Slovakia [33,41,55,58,60,67] |
| ***Penicillium corylophilum*** Dierckx | France, Italy, Lithuania, Poland [3,8,18,19,39] | France, Italy, Poland [8,10,18] | Portugal [12] |
| ***Penicillium crustosum*** Thom | France, Poland [8,19] | France, Poland [8,19] | - |
| ***Penicillium cyclopium*** Westling | Poland [18] | Italy [10] | - |
| ***Penicillium decumbens*** Thom | - | - | Argentina, Cuba, Italy, Portugal [12,33,44] |
| ***Penicillium dierckxii*** Biourge | - | - | Brazil (da Silva et al., 2006) |
| ***Penicillium digitatum***(Pers.) Sacc. | Egypt [36] | Italy [10] | - |
| ***Penicillium diversum*** Raper & Fennell | Italy [20] | - | - |
| ***Penicillium expansum*** Link | Egypt, Lithuania [3,36] | - | - |
| ***Penicillium echinulatum*** Raper & Thom ex Fassat. | - | - | Japan [67] |
| ***Penicillium fellutanum*** Biourge | *See current name: Penicillium dierckxii* | | |
| ***Penicillium freii*** Frisvad & Samson | Poland [19] | Poland [19] | - |
| ***Penicillium funiculosum*** Thom | Lithuania, Poland [3,17,18] | - | Israel, Poland [48,52] |
| ***Penicillium glabrum***(Wehmer) Westling | Italy [20,39] | - | Portugal [12] |
| ***Penicillium griseofulvum*** Dierckx | Argentina, Cuba, Poland, Portugal [6,19,33] | Italy [10] | Portugal [12] |
| ***Penicillium helicum*** Raper & Fennell | - | - | Portugal [38] |
| ***Penicillium hirsutum*** Dierckx | Poland [19] | - | - |
| ***Penicillium islandicum*** Sopp | - | - | India [37] |
| ***Penicillium italicum*** Wehmer | Egypt, Italy [36,39] | Italy [10] | - |
| ***Penicillium lividum*** Westling | *See current name: Penicillium spinulosum* | | |
| ***Penicillium*** ***miczynskii*** K. M. Zalessky | - | Italy [10] | - |
| ***Penicillium minioluteum***Dierckx | - | - | France [56] |
| ***Penicillium ochraceum*** (Bainier) Thom | *See current name: Penicillium aurantiogriseum* | | |
| ***Penicillium olsonii*** Bainier & Sartory | France [8] | Poland [19] | - |
| ***Penicillium oxalicum*** Currie and Thom | India, Lithuania, Nigeria, Poland, Portugal [1,3,6,19,47] | Italy [10] | Indonesia, Portugal [12,49] |
| ***Penicillium paxilli*** Bainier | - | - | Italy [45,51] |
| ***Penicillium pinophilum***Hedgc | - | - | Italy [60,64] |
| ***Penicillium purpurascens*** (Sopp) Biourge | Lithuania [3] | - | - |
| ***Penicillium purpurescens*** (Sopp) Raper & Thom | *See current name:* *Penicillium purpurascens* | | |
| ***Penicillium purpurogenum*** Stoll | Poland, Spain [17,22] | - | Italy [59] |
| ***Penicillium restrictum*** [J.C. Gilman & E.V. Abbott](http://www.mycobank.org/BioloMICS.aspx?TableKey=14682616000000067&Rec=19227&Fields=All) | - | Cuba [30] | Brazil, Italy [14,45,51][14,45,51](da Silva et al. 2006; Zotti et al. 2007; Zotti et al. 2008)[14,45,51]<sup>14,45,51</sup> |
| ***Penicillium rubens***Biourge | - | Italy [20] | Indonesia [49] |
| ***Penicillium rugulosum*** Thom | *See current name: Talaromyces rugulosus* | | |
| ***Penicillium simplicissimum*** (Oudem.) Thom | Cuba, Poland [19,30] | Cuba, Poland [19,30] | Portugal [12] |
| ***Penicillium sizovae*** Baghd**.** | Italy [20,39] | - | - |
| ***Penicillium solitum*** Westling | - | - | Japan, Portugal [12,67] |
| ***Penicillium spinulosum*** Thom | Italy, Lithuania, Poland [3,18,20] | Italy [10] | Czech Republic, Italy, Poland, Portugal [12,15,45,48,51,62] |
| ***Penicillium steckii*** K.M. Zalessky | - | Italy [20] | Italy [45,51] |
| ***Penicillium sublateritum*** Biourge | Poland [17] | - | - |
| ***Penicillium terrigenum*** Seifert, Houbraken, Frisvad & Samson | Italy [20] | - | - |
| ***Penicillium turbatum*** Westling | Italy [20] | - | Italy [45,51] |
| ***Penicillium variabile*** Sopp | - | - | Italy, Portugal [12,44] |
| ***Penicillium vancouverense*** Houbraken, Frisvad & Samson | - | - | Japan [67] |
| ***Penicillium verrucosum*** Dierckx | Lithuania, Poland [3,17] | Poland [21] | Poland [48] |
| ***Penicillium viridicatum*** Westling | Poland [19] | Italy [10] | - |
| ***Penicillium waksmanii*** K. M. Zalessky | Poland [17,19] | Cuba, Italy [10,30] | - |
| ***Penicillium westlingii*** K.M. Zalessky | - | - | Costa Rica [43] |
| ***Penicillium wortmannii*** Klöcker | *See current name:*  *Talaromyces wortmannii* | | |
| ***Peniophora* sp.** | - | - | Czech Republic, Poland [15] |
| ***Peniophora lycii (Pers.)*** Höhn. & Litsch. | Italy [20] | - | - |
| ***Peniophora tamaricicola*** Boidin & Malençon | Italy [20] | - | - |
| ***Pestalotia* sp.**De Not. | Spain [24] | - | - |
| ***Periconia* sp.** Tode | India [32] | - | Costa Rica [43] |
| ***Periconia cookei*** E.W. Mason & M.B. Ellis | - | Italy [10] | - |
| ***Pestalotia* sp.** De Not. | Cuba [29,30] | - | - |
| ***Peziza ostracoderma*** Korf | - | - | Italy [44] |
| ***Phaeomarasmius* sp.** Scherff. | - | - | Czech Republic, Poland [15] |
| ***Phaeosphaeria* sp.** I. Miyake | - | - | Czech Republic, Poland [15] |
| ***Phaeosphaeria herpotrichoides***(De Not.) L. Holm | Italy [20,39] | - | - |
| ***Phaeosphaeria microscopica*** (P. Karst.) O.E. Erikss | Italy [20] | - | - |
| ***Phaeospheria typharum*** (Desm.) L. Holm | *See current name: Juncaceicola typharum* | | |
| ***Phanerochaete* sp.** P. Karst. | - | - | Czech Republic, Poland [15] |
| ***Phellinus* sp.** Quél. | - | - | Czech Republic, Poland [15] |
| ***Phialemonium sp.*** W. Gams & McGinnis | - | Portugal [4,5] | Portugal [4] |
| ***Phialophora* sp.** Medlar | - | Portugal [4,5] | Finland, Portugal [11,12] |
| ***Phlebia subserialis*** (Bourdot & Galzin) Donk | - | - | Portugal [38] |
| ***Phlebiopsis* sp.** Jülich | - | - | Czech Republic, Poland [15] |
| ***Phlebiopsis gigantea*** (Fr.) Jülich | - | - | Portugal [38] |
| ***Pholiota* sp.** (Fr.) P. Kumm. | - | - | Czech Republic, Poland [15] |
| ***Phoma* sp.** Sacc. | Brazil, France, India, Portugal [4,5,8,25,32] | Portugal [4,5] | Czech Republic, Poland, Portugal [12,15] |
| ***Phoma betae*** A.B. Frank | *See curent name: Neocamarosporium betae* | | |
| ***Phoma glomerata*** (Corda) Wollenw. & Hochapfe | *See curent name: Didymella glomerata* | | |
| ***Phoma herbarum*** Westend | - | - | Slovakia [58] |
| ***Phoma leveillei*** Boerema & G.J. Bollen | Lithuania [3] | - | - |
| ***Phoma medicaginis***Malbr. & Roum. | *See current name: Ascochyta medicaginicola* | | |
| ***Phoma negriana*** Thüm. | *See current name: Didymella negriana* | | |
| ***Phoma pomorum*** Thüm. | *See current name: Didymella pomorum* | | |
| ***Phyllotopsis* sp.** *E.-J. Gilbert & Donk ex Singer* | - | - | Czech Republic, Poland [15] |
| ***Piptoporus* sp.** P. Karst. | - | - | Czech Republic, Poland [15] |
| ***Pithomyces* sp.** Berk. & Broome | Mexico [7] | Italy, Portugal [4,5,10] | - |
| ***Pleosporales* sp.** Luttr. Ex M.E. Barr | Italy [20,39] | - | Czech Republic, Poland [15] |
| ***Pleurocybella* sp.** Singer | - | - | Czech Republic, Poland [15] |
| ***Pleurotus* sp.** (Fr.) P. Kumm. | - | - | Czech Republic, Poland [15] |
| ***Pluteus* sp.** Fr. | - | - | Czech Republic, Poland [15] |
| ***Pochonia* sp.** Bat. & O.M. Fonseca | - | - | Czech Republic, Poland [15] |
| ***Podospora* sp*.*** Ces***.*** | - | - | Czech Republic, Poland [15] |
| ***Polycephalomyces* sp*.*** Kobayasi | - | - | Czech Republic, Poland [15] |
| ***Polyporales* sp.** Gäum. | - | - | Czech Republic, Poland [15] |
| ***Polyporus* sp.** P. Micheli ex Adans. | - | - | Czech Republic, Poland [15] |
| ***Polyporus brumalis*** (Pers.) Fr. | - | - | France [56] |
| ***Porostereum* sp.** Pilát | - | - | Czech Republic, Poland [15] |
| ***Pseudogymnoascus pannorum*** (Link) Minnis & D.L. Lindner | - | Portugal [4,5] | Italy [45,51] |
| ***Pseudopestalotiopsis theae*** (Sawada) Maharachch., K.D. Hyde & Crous, | Nigeria [47] | - | - |
| ***Pseudotaeniolina globosa*** De Leo, Urzì & De Hoog | Italy [20] | - | - |
| ***Psilocybe* sp.** (Fr.) P. Kumm. | - | - | Czech Republic, Poland [15] |
| ***Purpureocillium* sp.** Luangsa-ard, Hywel-Jones, Houbraken & Samson | - | - | Czech Republic, Poland [15] |
| ***Pyricularia* sp.** (Sacc.) Sacc. | Colombia [9] | - | - |
| ***Pyronema* sp*.*** Carus | - | - | Czech Republic, Poland [15] |
| ***Ramichloridium* sp.** Stahel ex de Hoog | - | Portugal [4,5] | - |
| ***Resinicium* sp.** Parmasto | - | - | Czech Republic, Poland [15] |
| ***Rhizomucor* sp.**Lucet & Costantin | - | Portugal [4,5] | - |
| ***Rhizomucor pusillus*** (Lindt) Schipper | Lithuania [3] | - | - |
| ***Rhizopus* sp.**Ehrenb. | Brazil, Colombia, France, India, Spain [8,9,24,25,27,32] | Portugal [4,5] | Brazil, Czech Republic, Finland, Iran, Nigeria, Poland, Portugal [11–13,15,50,54] |
| ***Rhizopus arrhizus*** A. Fisch | *See current name: Rhizopus oryzae* | | |
| ***Rhizopus nigricans*** Ehrenb. | *See current name: Rhizopus stolonifer var. stolonifer* | | |
| ***Rhizopus oryzae*** Went & Prins. Geerl. | Poland [17,19] | Poland, Portugal [4,5,19] | Italy [60] |
| ***Rhizopus stolonifer***(Ehrenb.) Vuill. | Egypt, India, Poland, Portugal, Spain [1,4,5,17,22,36,68] | - | - |
| ***Rhizopus stolonifer var. stolonifer*** (?) | Poland [18] | Poland [18] | - |
| ***Rhodotorula* sp*.*** F.C. Harrison | Brazil, Colombia, Cuba, France, Lithuania, Mexico [3,7–9,25,29] | France, Poland [8,19] | Czech Republic, Poland [15] |
| ***Rhodotorula aurantiaca*** (Saito) Lodder | - | - | Italy [64] |
| ***Rhodotorula glutinis*** (Fresen.) F.C. Harrison | *See current name: Rhodotorula glutinis var. glutinis* | | |
| ***Rhodotorula glutinis var. glutinis*** (?) | Poland [17] | Portugal [4,5] | - |
| ***Rhodotorula mucilaginosa***(A. Jörg.) F.C. Harrison | *See current name: Rhodotorula mucilaginosa var. mucilaginosa* | | |
| ***Rhodotorula mucilaginosa var. mucilaginosa*** (?) | Poland [17] | - | Czech Republic, Poland [15,62] |
| ***Saccharicola bicolor***(D. Hawksworth, W.J. Kaiser & Ndimande) D. Hawksworth & O.E. Eriksson | *See current name: Stagonospora bicolor* | | |
| ***Saccharomyces* sp.** Meyen ex Hansen | India [32] | *-* | *-* |
| ***Sarcomyxa* sp.** P. Karst. | *See current name: Panellus sp.* | | |
| ***Sarocladium* sp.** W. Gams & D. Hawksw. | - | - | Czech Republic, Poland [15] |
| **Sarocladium kiliense**(Grütz) Summerbell | Lithuania [3] | - | Brazil [54] |
| ***Scedosporium* sp.** Sacc. Ex Castell. & Chalm. | Portugal [4,5] | Portugal [4,5] | Portugal [4] |
| ***Schizophyllum* sp.** Fr. | - | - | Czech Republic, Poland [15] |
| ***Schizophyllum commune*** Fr. | Italy [20,39] | - | Morocco [55] |
| ***Sclerotinia* sp.** Fuckel | Colombia [9] | - | - |
| ***Scolecobasidium* sp.**E.V. Abbott | Lithuania [3] | - | - |
| ***Scopulariopsis* sp.** Bainier | Argentina, Cuba, France, Italy, Portugal, Spain [2,4,5,8,23,24,33] | Portugal [4,5] | Argentina, Czech Republic, Cuba, Finland, Poland [11,15,33] |
| ***Scopulariopsis asperula*** (Sacc.) S. Hughes | Poland [17] | Portugal [4,5] | Portugal [4] |
| ***Scopulariopsis brevicaulis*** (Sacc.) Bainier | Poland [17] | Italy [20] | - |
| ***Scopulariopsis fusca*** Zach | *See current name:* *Scopulariopsis asperula* | | |
| ***Scorias* sp.** Fr***.*** | - | - | Czech Republic, Poland [15] |
| ***Scytalidium* sp.** Pesante | - | Portugal [4,5] | Portugal [4] |
| ***Serendipita* sp.** P. Roberts | - | - | Czech Republic, Poland [15] |
| ***Sepedonium* sp.**Link | Argentina [2] | - | - |
| ***Simocybe* sp.**P. Karst. | - | - | Czech Republic, Poland [15] |
| ***Skeletocutis* sp.** Kotlába & Pouzar | - | - | Portugal [38] |
| ***Sordaria* sp.** Ces. & De Not. | - | - | Czech Republic, Poland [15] |
| ***Spicaria* sp.** Harting | *See current name: Clonostachys* | | |
| ***Sporidiobolus pararoseus*** Fell & Tallman | Italy [20] | - | - |
| ***Sporobolomyces roseus*** Kluyver & C.B. Niel | Cuba [16] | - | - |
| ***Sporodiniella umbellata*** Boedijn | Lithuania [3] | - | - |
| ***Sporotrichum olivaceum***(Link) Fr. | Lithuania [3] | - | - |
| ***Sporothrix* sp.** Hektoen & C.F. Perkins | Argentina [2] | - | - |
| ***Stachybotrys* sp.**Corda | India [32] | - | Finland [11] |
| ***Stachybotrys chartarum*** (Ehrenb.) S. Hughes | Colombia, Italy, Lithuania, Spain [3,20,24,53] | - | Colombia, India, Italy, Japan, Portugal [37,41,53,65–67] |
| ***Stagonospora bicolor*** (D. Hawksw., W.J. Kaiser & Ndimande) Kaz. Tanaka & K. Hiray. | - | - | France [56] |
| ***Stemphylium* sp.**Wallr. | Argentina, Italy, Mexico, Spain [2,7,23,24] | Portugal [4,5] | - |
| ***Stereum gausapatum*** (Fr.) Fr. | Italy [20] | - | - |
| ***Strobilurus* sp.** Singer | - | - | Czech Republic, Poland [15] |
| ***Stropharia* sp.** (Fr.) Quél. | - | - | Czech Republic, Poland [15] |
| ***Sydowia* sp.** Bres**.** | - | - | Czech Republic, Poland [15] |
| ***Syncephalastrum* sp.**J. Schröt. | Argentina, Cuba, India, [32,33] | - | - |
| ***Syncephalastrum racemosum*** Cohn | India [1] | - | - |
| ***Talaromyces* sp.**C.R. Benj. | - | - | Czech Republic, Poland [15] |
| ***Talaromyces flavus***(Klöcker) Stolk & Samson | - | - | Greece [35] |
| ***Talaromyces helicus*** C.R. Benj. | Poland [18] | - | Argentina, Cuba [33] |
| ***Talaromyces rugulosus*** (Thom) Samson, Yilmaz, Frisvad and Seifert | Poland [18] | Italy [10] | Italy [61] |
| ***Talaromyces wortmannii*** (Klöcker) C.R. Benj. | - | - | India [37] |
| ***Taphrina* sp.** Fr. | - | - | Czech Republic, Poland [15] |
| ***Teratosphaeria* sp.**Syd. & P. Syd. | - | - | Czech Republic, Poland [15] |
| ***Termitomyces* sp.** R. Heim | - | - | Czech Republic, Poland [15] |
| ***Tetraploa* sp.** Berk. & Broome | India [32] | - | - |
| ***Tilletia s*p.** Tul. & C. Tul. | - | - | Czech Republic, Poland [15] |
| ***Thanatephorus cucumeris*** (A.B. Frank) Donk | - | - | Portugal [38] |
| ***Thermomyces* sp.** Tsikl***.*** | - | - | Czech Republic, Poland [15] |
| ***Thielavia* sp.** Zopf | - | - | Czech Republic, Poland [15] |
| ***Thielavia hyalocarpa*** Arx | - | - | USA [57] |
| ***Tolypocladium* sp.** W. Gams | - | - | Czech Republic, Poland [15] |
| ***Torula* sp.** Pers. | Cuba, India, Mexico [7,29,32] | - | - |
| ***Torula herbarum*** (Pers.) Link | - | Italy [10] | India [37] |
| ***Toxicocladosporium* sp.** Crous & U. Braun | - | - | Czech Republic, Poland [15] |
| ***Toxicocladosporium irritans***Crous & U. Braun | - | - | Portugal [38] |
| ***Trametes* sp.** Fr. | - | - | Czech Republic, Poland [15] |
| ***Trametes ochracea***([Pers.](https://www.first-nature.com/fungi/~biog-persoon.php)) Gilb. & Ryvarden | - | - | Greece [35] |
| ***Tremella* sp.** Pers. | - | - | Czech Republic, Poland [15] |
| ***Tremiscus* sp.** (Pers.) Lév. | - | - | Czech Republic, Poland [15] |
| ***Trichocladium* sp.**Harz | Argentina, Spain [2,24] | - | - |
| ***Trichocladium griseum*** (Traaen) X. Wei Wang & Houbraken | - | Portugal [4,5] | Portugal [4] |
| ***Trichocomaceae* sp.**E. Fisch. | - | - | Nigeria [47] |
| ***Trichoderma* sp.** Pers. | Brazil, France, India, Lithuania, Poland, Portugal, Spain [3–5,8,17,24,25,32] | France, Italy, Portugal [4,5,8,10] | Czech Republic, Finland, Iran, Italy, Poland, Portugal [11–13,15,44,60] |
| ***Trichoderma atroviride*** P. Karst | - | - | Nigeria [47] |
| ***Trichoderma aureoviride*** Rifai | - | Italy [10] | - |
| ***Trichoderma citrinoviride*** Bissett | - | - | France [56] |
| ***Trichoderma hamatum*** (Bonord.) Bainier | - | Italy [10] | - |
| ***Trichoderma harzianum*** Rifai | - | Italy [10] | Poland [48] |
| ***Trichoderma koningii*** Oudem**.** | Poland [19] | Poland [19] | France [56] |
| ***Trichoderma longibrachiatum*** Rifai | - | Portugal [4,5] | Costa Rica, Indonesia [43,49] |
| ***Trichoderma pseudokoningii*** Rifai | - | - | Italy [45,51] |
| ***Trichoderma virens*** (J.H. Mill., Giddens & A.A. Foster) Arx | Lithuania [3] | - | - |
| ***Trichoderma víride*** Pers. | Cuba, Egypt, Lithuania, Poland, Spain [3,16–18,24,36] | Poland [19] | Portugal [4,12] |
| ***Tricholomopsis* sp.** Singer | - | - | Czech Republic, Poland [15] |
| ***Trichosporon* sp.** Behrend | Mexico [7] | - | - |
| ***Trichosporum* sp.**Vuill**.** | - | - | Brazil (da Silva et al., 2006) |
| ***Trichothecium* sp.**Link | India, Mexico [7,32] | Portugal [4,5] | - |
| ***Trichothecium laxicephalum*** (Kamyschko) M.A. Litv. | Poland [17] | - | - |
| ***Trichothecium roseum***(Pers.) Link | Poland, Spain [17,18,24] | - | - |
| ***Trichurus* sp.** Clem | *See current name: Cephalotrichum* | | |
| ***Tricophyton* sp.** Malmsten | Italy [23] | - | - |
| ***Tritirachium* sp.** Limber | - | - | Finland [11] |
| ***Umbilicaria* sp.** Hoffm. | - | - | Czech Republic, Poland [15] |
| ***Ulocladium* sp.**Preuss | Argentina, France, Mexico, Poland, Portugal, Spain [2,4,5,7,8,17,19,24] | Portugal [4,5] | - |
| ***Ulocladium botrytis*** Preuss | - | - | Italy [44] |
| ***Ulocladium consortiale*** (Thüm.) E.G. Simmons | Poland [19] | - | - |
| ***Ulocladium chartarum***(Preuss) E.G. Simmons | Poland [18] | - | France [56] |
| ***Ulocladium cucurbitae*** (Letendre & Roum.) E.G. Simmons | - | - | France [56] |
| ***Ustilago* sp.**(Pers.) Roussell | - | Portugal [4,5] | - |
| ***Valsa* sp.** Fr. | - | - | Czech Republic, Poland [15] |
| ***Verticillium* sp.**Nees | Colombia, Poland [9,18] | - | - |
| ***Verticillium album*** (Preuss) Pidopl. | *See current name: Acrostalagmus albus* | | |
| ***Volvariella* sp.** Speg. | - | - | Czech Republic, Poland [15] |
| ***Wallemia sebi***(Fr.) Arx | France, Poland, Portugal [4,5,8,17] | France, Portugal [4,5,8] | Italy [64] |
| ***Zasmidium* sp.** Fr. | - | - | Czech Republic, Poland [15] |
| ***Zygosporium* sp.** Mont. | Cuba [29] | - | - |
| **Non-sporulating fungi / Mycelia sterilia / Sterile mycelia** | Argentina, Brazil, Colombia, Cuba, France, India, Italy, Lithuania, Mexico, Portugal [1,3,32,33,39,4,5,7–9,20,25,31] | Italy, Portugal [4,5,10,20] | Brazil, Italy [14,44,45,51] |

? – Nomenclature under study.

**Supplementary Table 1 References**

[1] B.K. Nayak, Volumetric samplings of airborne fungal spores in different college libraries : A Preliminary study, Int. J. PharmTech Res. 8 (2015) 306–312.

[2] D.J. Bueno, J.O. Silva, G. Oliver, Hongos ambientales en una biblioteca: un año de estudio, An. Doc. (2003) 27–34.

[3] A. Lugauskas, A. Krikstaponis, Microscopic fungi found in the libraries of vilnius and factors affecting their development, Indoor Built Environ. 13 (2004) 169–182. doi:10.1177/1420326x04045274.

[4] A.C.M. da S. Pinheiro, Fungal communities in archives: assessment strategies and impact on paper conservation and human health, Universidade Nova de Lisboa, 2014.

[5] A. Pinheiro, Fungi in Archives: a Double Concern, in: Viegas, Pinheiro, Sabino, Viegas, Brandão, Veríssimo (Eds.), Environ. Mycol. Public Heal. Fungi Mycotoxins Risk Assess. Manag., Academic Press, Oxford, 2015: pp. 157–166.

[6] I. Nunes, N. Mesquita, S. Cabo Verde, A.M.L. Bandeira, M.M. Carolino, A. Portugal, M.L. Botelho, Characterization of an airborne microbial community: A case study in the archive of the University of Coimbra, Portugal, Int. Biodeterior. Biodegradation. 79 (2013) 36–41. doi:10.1016/j.ibiod.2013.01.013.

[7] M. de G.M. Zárate, E.E. Domínguez, P.R. Mateos, J.F.C. Rodríguez, Ismael Acosta González, L.E.F. Morales, Aislamiento de hongos alergenos en una biblioteca universitaria, Acta Univ. 25 (2015) 32–38. doi:10.15174/au.2015.758.

[8] S. Roussel, G. Reboux, L. Millon, M.D. Parchas, S. Boudih, F. Skana, M. Delaforge, M.S. Rakotonirainy, Microbiological evaluation of ten French archives and link to occupational symptoms, Indoor Air. 22 (2012) 514–522. doi:10.1111/j.1600-0668.2012.00781.x.

[9] D.R. Hernández-Velandia, L.M. Lizarazo-Forero, Determinación y comparación aerobiológica en tres archivos de la empresa de energía de Boyacá, Tunja (Colombia), Salud Uninorte. 31 (2015) 537–547. doi:10.14482/sun.31.3.5311.

[10] O. Maggi, A.M. Persiani, F. Gallo, P. Valenti, G. Pasquariello, M.C. Sclocchi, M. Scorrano, Airborne fungal spores in dust present in archives: Proposal for a detection method, new for archival materials, Aerobiologia (Bologna). 16 (2000) 429–434.

[11] A. Hyvärinen, T. Meklin, A. Vepsalainen, A. Nevalainen, Fungi and actinobacteria in moisture-damaged building materials — concentrations and diversity, Int. Biodeterior. Biodegradation. 49 (2002) 27–37. doi:10.1016/S0964-8305(01)00103-2.

[12] M.J.L. Lourenço, L. V Pol, J.P. Sampaio, A. Philips, A. Fonseca, J. Vieira, Isolamento, identificação e caracterização de microrganismos contaminantes dos arquivos da Direcção Geral dos Edifícios e Monumentos Nacionais, in: A História, a Formação e as Boas Práticas Em Conserv. e Restauro, Atas do 4o Encontro do Instituto Português de Conservação e Restauro, Lisbon, 2005: p. CD-ROM.

[13] A. Shamsian, A. Fata, M. Mohajeri, K. Ghazvini, Fungal Contaminations in Historical Manuscripts at Astan Quds Museum Library, Mashhad, Iran, Int. J. Agric. Biol. 8 (2006) 420–422.

[14] M. da Silva, A.M.L. Moraes, M.M. Nishikawa, M.J.A. Gatti, M.A. V de Alencar, L.E. Brandao, A. Nobrega, Inactivation of fungi from deteriorated paper materials by radiation, Int. Biodeterior. Biodegradation. 57 (2006) 163–167. doi:DOI 10.1016/j.ibiod.2006.02.003.

[15] L. Kraková, K. Šoltys, A. Otlewska, K. Pietrzak, S. Purkrtová, D. Savická, A. Puškárová, M. Bučková, T. Szemes, J. Budiš, K. Demnerová, B. Gutarowska, D. Pangallo, Comparison of methods for identification of microbial communities in book collections: Culture-dependent (sequencing and MALDI-TOF MS) and culture-independent (Illumina MiSeq), Int. Biodeterior. Biodegradation. 131 (2018) 51–59. doi:10.1016/j.ibiod.2017.02.015.

[16] M. Anaya, S.F. Borrego, E. Gámez, M. Castro, A. Molina, O. Valdés, Viable fungi in the air of indoor environments of the National Archive of the Republic of Cuba, Aerobiologia (Bologna). 32 (2016) 513–527. doi:10.1007/s10453-016-9429-3.

[17] A. Wlazło, R.L. Górny, R. Złotkowska, A. Lawniczek, B. Ludzeń-Izbińska, A.S. Harkawy, E. Anczyk, Workers’ exposure to selected biological agents in libraries of Upper Silesia, Med. Pr. 59 (2008) 159–170.

[18] K. Zielińska-Jankiewicz, A. Kozajda, M. Piotrowska, I. Szadkowska-Stańczyk, Microbiological Contamination With Moulds in Work Environment, Ann. Agric. Environ. Med. 15 (2008) 71–78.

[19] J. Skóra, B. Gutarowska, K. Pielech-Przybylska, L. Stepien, K. Pietrzak, M. Piotrowska, P. Pietrowski, Assessment of microbiological contamination in the work environments of museums, archives and libraries, Aerobiologia (Bologna). 31 (2015) 389–401. doi:10.1007/s10453-015-9372-8.

[20] A. Micheluz, M. Sulyok, S. Manente, R. Krska, G.C. Varese, G. Ravagnan, Fungal secondary metabolite analysis applied to Cultural Heritage: the case of a contaminated library in Venice, World Mycotoxin J. 9 (2016) 397–407. doi:10.3920/WMJ2015.1958.

[21] A. Harkawy, R.L. Górny, L. Ogierman, A. Wlazło, A. Ławniczek-Wałczyk, A. Niesler, Bioaerosol assessment in naturally ventilated historical library building with restricted personnel access, Ann. Agric. Environ. Med. 18 (2011) 323–329.

[22] M.J. Aira, V. Jato, a. M. Stchigel, F.J. Rodríguez-Rajo, E. Piontelli, Aeromycological study in the Cathedral of Santiago de Compostela (Spain), Int. Biodeterior. Biodegradation. 60 (2007) 231–237. doi:10.1016/j.ibiod.2007.02.007.

[23] L. Ruga, T. Bonofiglio, F. Orlandi, B. Romano, M. Fornaciari, Analysis of the potential fungal biodeteriogen effects in the “Doctorate Library” of the University of Perugia, Italy, Grana. 47 (2008) 60–69. doi:10.1080/00173130801916624.

[24] N. Valentin, Microbial Contamination in Archives and Museums: Health Hazards and Preventive Strategies Using Air Ventilation Systems, in: F. Boersma (Ed.), Expert. Roundtable Sustain. Clim. Manag. Strateg., The Getty Conservation Institute, Tenerife, Spain, 2007: pp. 1–26.

[25] W. Gambale, J. Croce, E. Costa-Manso, M. Croce, M. Sales, Library fungi at the University of Sao Paulo and their relationship with respiratory allergy, J. Investig. Allergol. Clin. Immunol. 3 (1993) 45.50.

[26] S.F. Hayleeyesus, A.M. Manaye, Microbiological Quality of Indoor Air in University Libraries, Asian Pac. J. Trop. Biomed. 4 (2014) S312–S317. doi:10.12980/APJTB.4.2014C807.

[27] L. Dalal, M. Bhowal, S. Kalbende, Incidence of deteriorating fungi in the air inside the college libraries of Wardha city, Arch. Appl. Sci. Res. 3 (2011) 479–485.

[28] E. Di Carlo, R. Chisesi, G. Barresi, S. Barbaro, G. Lombardo, V. Rotolo, M. Sebastianelli, G. Travagliato, F. Palla, Fungi and Bacteria in Indoor Cultural Heritage Environments: Microbial-related Risks for Artworks and Human Health, Environ. Ecol. Res. 4 (2016) 257–264. doi:10.13189/eer.2016.040504.

[29] A. Molina-Veloso, Borrego-Alonso, S. F., Viable allergenic fungi in a documentary deposit of the National Archive of Cuba, Rev. Alerg. México. 64 (2017) 40–51.

[30] S. Borrego, A. Molina, A. Santana, Fungi in Archive Repositories Environments and the Deterioration of the Graphics Documents, EC Microbiol. 11 (2017) 205–226.

[31] S. Borrego, I. Perdomo, Airborne microorganisms cultivable on naturally ventilated document repositories of the National Archive of Cuba, Environ. Sci. Pollut. Res. 23 (2016) 3747–3757. doi:10.1007/s11356-015-5585-1.

[32] J. Thaware, S. Jawade, S.K.P. College, K. Dist-nagpur, Comparative aeromycological study of three libraries in Kamptee, 2 (2014) 42–47.

[33] S. Borrego, P. Lavin, I. Perdomo, S. Gómez de Saravia, P. Guiamet, Determination of Indoor Air Quality in Archives and Biodeterioration of the Documentary Heritage, ISRN Microbiol. 2012 (2012) 1–10. doi:10.5402/2012/680598.

[34] A. Michaelsen, Foxing of paper caused by fungi and molecular monitoring of conservation treatments, Universität Wien, 2010.

[35] K. Karakasidou, K. Nikolouli, G.D. Amoutzias, A. Pournou, C. Manassis, G. Tsiamis, D. Mossialos, Microbial diversity in biodeteriorated Greek historical documents dating back to the 19th and 20th century: A case study, Microbiologyopen. e00596 (2018) 1–11. doi:10.1002/mbo3.596.

[36] M. Osman, A.H. Awad, Y. Ibrahim, Y. Ahmed, A. Abo-Elnasr, Y. Saeed, Air microbial contamination and factors affecting its occurrence in certain book libraries in Egypt., Egypt. J. Bot. 57 (2017) 93–118. doi:10.21608/ejbo.2016.277.1007.

[37] M.K.L. Das, J.S. Prasad, S.K. Ahmad, Endoglucanase production by paper-degrading mycoflora, Lett. Appl. Microbiol. 25 (1997) 313–315. doi:10.1046/j.1472-765X.1997.00217.x.

[38] N. Mesquita, A. Portugal, S. Videira, S. Rodriguez-Echeverria, A.M.L. Bandeira, M.J.A. Santos, H. Freitas, Fungal diversity in ancient documents. A case study on the Archive of the University of Coimbra, Int. Biodeterior. Biodegradation. 63 (2009) 626–629. doi:10.1016/j.ibiod.2009.03.010.

[39] A. Micheluz, S. Manente, V. Tigini, V. Prigione, F. Pinzari, G. Ravagnan, G.C. Varese, The extreme environment of a library: Xerophilic fungi inhabiting indoor niches, Int. Biodeterior. Biodegradation. 99 (2015) 1–7. doi:10.1016/j.ibiod.2014.12.012.

[40] H. Szczepanowska, A.. Cavaliere, Fungal deterioration of 18th and 19th century documents: A case study of the Tilghman Family Collection, Wye House, Easton, Maryland, Int. Biodeterior. Biodegradation. 46 (2000) 245–249. doi:10.1016/S0964-8305(00)00061-5.

[41] S.O. Sequeira, H.P. de Carvalho, N. Mesquita, A. Portugal, M.F. Macedo, Fungal Stains on Paper: Is What You See What You Get?, Conserv. Património. in press (n.d.).

[42] R. Fitri, A. Oetari, M. Rahmadewi, M.A. Manullang, M.K. Rachmania, T. Susetyo-Salim, W. Sjamsuridzal, Detection of fungi from old Chinese manuscripts in Central Library Universitas Indonesia, AIP Conf. Proc. 1729 (2016) 2–6. doi:10.1063/1.4946972.

[43] C. Coronado-Ruiz, R. Avendaño, E. Escudero-Leyva, G. Conejo-Barboza, P. Chaverri, M. Chavarría, Two new cellulolytic fungal species isolated from a 19th-century art collection, Sci. Rep. 8 (2018) 1–9. doi:10.1038/s41598-018-24934-7.

[44] A.M. Corte, A. Ferroni, V.S. Salvo, Isolation of fungal species from test samples and maps damaged by foxing, and correlation between these species and the environment, Int. Biodeterior. Biodegradation. 51 (2003) 167–173. doi:PII S0964-8305(02)00137-3.

[45] M. Zotti, A. Ferroni, P. Calvini, Inhibition Properties of Simple Fungistatic Compounds on Fungi Isolated from Foxing Spots, Restaurator. 28 (2007) 201–217. doi:10.1515/REST.2007.201.

[46] M. Montanari, V. Melloni, F. Pinzari, G. Innocenti, Fungal biodeterioration of historical library materials stored in Compactus movable shelves, Int. Biodeterior. Biodegradation. 75 (2012) 83–88. doi:10.1016/j.ibiod.2012.03.011.

[47] O.E. Okpalanozie, S. Adebusoye, A., F. Troiano, C. Cattò, M.O. Ilori, F. Cappitelli, Assessment of indoor air environment of a Nigerian museum library and its biodeteriorated books using culture-dependent and –independent techniques, Int. Biodeterior. Biodegradation. 132 (2018) 139–149. doi:10.1016/j.ibiod.2018.03.003.

[48] B.F. Zerek, Fungi Isolated from Paper Works of Art - Identification, susceptibility to the chosen methods used in the conservation of paper, susceptibility of the chosen kinds of paper to infections, University of Warsaw, 2003.

[49] A. Oetari, T. Susetyo-Salim, W. Sjamsuridzal, E.A. Suherman, M. Monica, R. Wongso, R. Fitri, D.G. Nurlaili, D.C. Ayu, T.P. Teja, Occurrence of fungi on deteriorated old dluwang manuscripts from Indonesia, Int. Biodeterior. Biodegradation. 114 (2016) 94–103. doi:10.1016/j.ibiod.2016.05.025.

[50] O.M. Bankole, A review of biological deterioration of library materials and possible control strategies in the tropics, Libr. Rev. 59 (2010) 414–429.

[51] M. Zotti, A. Ferroni, P. Calvini, Microfungal biodeterioration of historic paper: Preliminary FTIR and microbiological analyses, Int. Biodeterior. Biodegradation. 62 (2008) 186–194.

[52] L. Nol, R.G. Kenneth, Biological factors of foxing in postage stamp paper, Int. Biodeterior. Biodegradation. 48 (2001) 98–104.

[53] N.I. Castillo, M. Ibáñez, E. Beltrán, J. Rivera-Monroy, J.C. Ochoa, M. Páez-Castillo, M.L. Posada-Buitrago, M. Sulyok, F. Hernndez, Identification of mycotoxins by UHPLC-QTOF MS in airborne fungi and fungi isolated from industrial paper and antique documents from the Archive of Bogotá, Environ. Res. 144 (2016) 130–138. doi:10.1016/j.envres.2015.10.031.

[54] F.S. Teixeira, T.A. dos Reis, L. Sgubin, L.E. Thomé, I.W. Bei, R.E. Clemencio, B. Corrêa, M.C. Salvadori, Disinfection of ancient paper contaminated with fungi using supercritical carbon dioxide, J. Cult. Herit. 30 (2018) 110–116. doi:10.1016/j.culher.2017.09.009.

[55] F. Bergadi, F. Laachari, S. Elabed, I.H. Mohammed, S.K. Ibnsouda, Cellulolytic potential and filter paper activity of fungi isolated from ancients manuscripts from the Medina of Fez, Ann. Microbiol. 64 (2014) 815–822. doi:10.1007/s13213-013-0718-6.

[56] M.S. Rakotonirainy, E. Heude, B. Lavédrine, Isolation and attempts of biomolecular characterization of fungal strains associated to foxing on a 19th century book, J. Cult. Herit. 8 (2007) 126–133.

[57] M.P. Di Bonaventura, R. DeSalle, D.E. Eveleigh, A. Baldwin, R.J. Koestler, Studies of fungal infestations of Tiffany’s Drawings: limits and advantages of classical and molecular techniques, in: R.J. Koestler, V.H. Koestler, A.E. Charola, F.E. Nieto-Fernández (Eds.), Art, Biol. Conserv. Biodeterior. Work. Art, The Metropolitan Museum of Art, New York, 2003: pp. 94–109.

[58] L. Kraková, K. Chovanová, S. a. Selim, A. Šimonovičová, A. Puškarová, A. Maková, D. Pangallo, A multiphasic approach for investigation of the microbial diversity and its biodegradative abilities in historical paper and parchment documents, Int. Biodeterior. Biodegradation. 70 (2012) 117–125. doi:10.1016/j.ibiod.2012.01.011.

[59] M. Zotti, A. Ferroni, P. Calvini, Mycological and FTIR analysis of biotic foxing on paper substrates, Int. Biodeterior. Biodegradation. 65 (2011) 569–578. doi:10.1016/j.ibiod.2010.01.011.

[60] A. Michaelsen, G. Pinar, M. Montanari, F. Pinzari, Biodeterioration and restoration of a 16th-century book using a combination of conventional and molecular techniques: A case study, Int. Biodeterior. Biodegradation. 63 (2009) 161–168. doi:DOI 10.1016/j.ibiod.2008.08.007.

[61] C. Adelantado, C. Bello, A. Borrell, M.A. Calvo, Evaluation of the Antifungal Activity of Products Used for Disinfecting Documents on Paper in Archives, Restaurator. 26 (2005) 235–238. doi:10.1515/REST.2005.235.

[62] K. Pietrzak, A. Otlewska, D. Danielewicz, K. Dybka, D. Pangallo, L. Kraková, A. Puškárová, M. Bučková, V. Scholtz, M. Ďurovič, B. Surma-Ślusarska, K. Demnerová, B. Gutarowska, Disinfection of archival documents using thyme essential oil, silver nanoparticles misting and low temperature plasma, J. Cult. Herit. 24 (2017) 69–77. doi:10.1016/j.culher.2016.10.011.

[63] H. Arai, Foxing caused by Fungi: twenty-five years of study, Int. Biodeterior. Biodegradation. 46 (2000) 181–188.

[64] A. Michaelsen, G. Piñar, F. Pinzari, Molecular and microscopical investigation of the microflora inhabiting a deteriorated Italian manuscript dated from the thirteenth century, Microb. Ecol. 60 (2010) 69–80. doi:10.1007/s00248-010-9667-9.

[65] A. Ricelli, A.A. Fabbri, C. Fanelli, R. Menicagli, S. Samaritani, D. Pini, S.M. Rapaccini, P. Salvadori, Fungal growth on samples of paper: Inhibition by new antifungals, Restaurator. 20 (1999) 97–107.

[66] A.A. Fabbri, A. Ricelli, S. Brasini, C. Fanelli, Effect of different antifungals on the control of paper biodeterioration caused by fungi, Int. Biodeterior. Biodegradation. 39 (1997) 61–65.

[67] Y. Sato, M. Aoki, R. Kigawa, Microbial deterioration of tsunami-affected paper-based objects: A case study, Int. Biodeterior. Biodegradation. 88 (2014) 142–149. doi:10.1016/j.ibiod.2013.12.007.

[68] A.K. Jain, Survey of bioaerosol in different indoor working environments in central India, Aerobiologia (Bologna). 16 (2000) 221–225. doi:10.1023/A:1007638132658.

[69] K. Sterflinger, P. Engel, Microorganisms in Books – First Results of the EU Project “Men and Books,” in: L. Watteeuw, C. Hofmann (Eds.), Pap. Conserv. Decis. Compromises / ICOM-CC Graph. Doc. Work. Gr. – Interim Meet., ICOM Committee for Conservation, Vienna, 2013: pp. 109–112.

[70] K. Sterflinger, P. Engel, Microorganisms in books – the Archives of the Protestant Parish of the Holy Trinity in Swidnica, in: Men Books From Microorg. to Megaorganisms, St. Pölten, 2014: p. Poster presentation.

[71] M.L.E. Florian, L. Manning, SEM analysis of irregular fungal fox spots in an 1854 book: population dynamics and species identification, Int. Biodeterior. Biodegradation. 46 (2000) 205–220.
